# Supplementary material for: Oxygen Exposure and Tolerance Shapes the Cell Wall-Associated Lipids of the Skin Commensal Cutibacterium acnes
Source: MDPI journal article supplement (doi:10.3390/microorganisms11092260), 2023-09-08
Supplement: s1 [file s1]

## Supplementary results

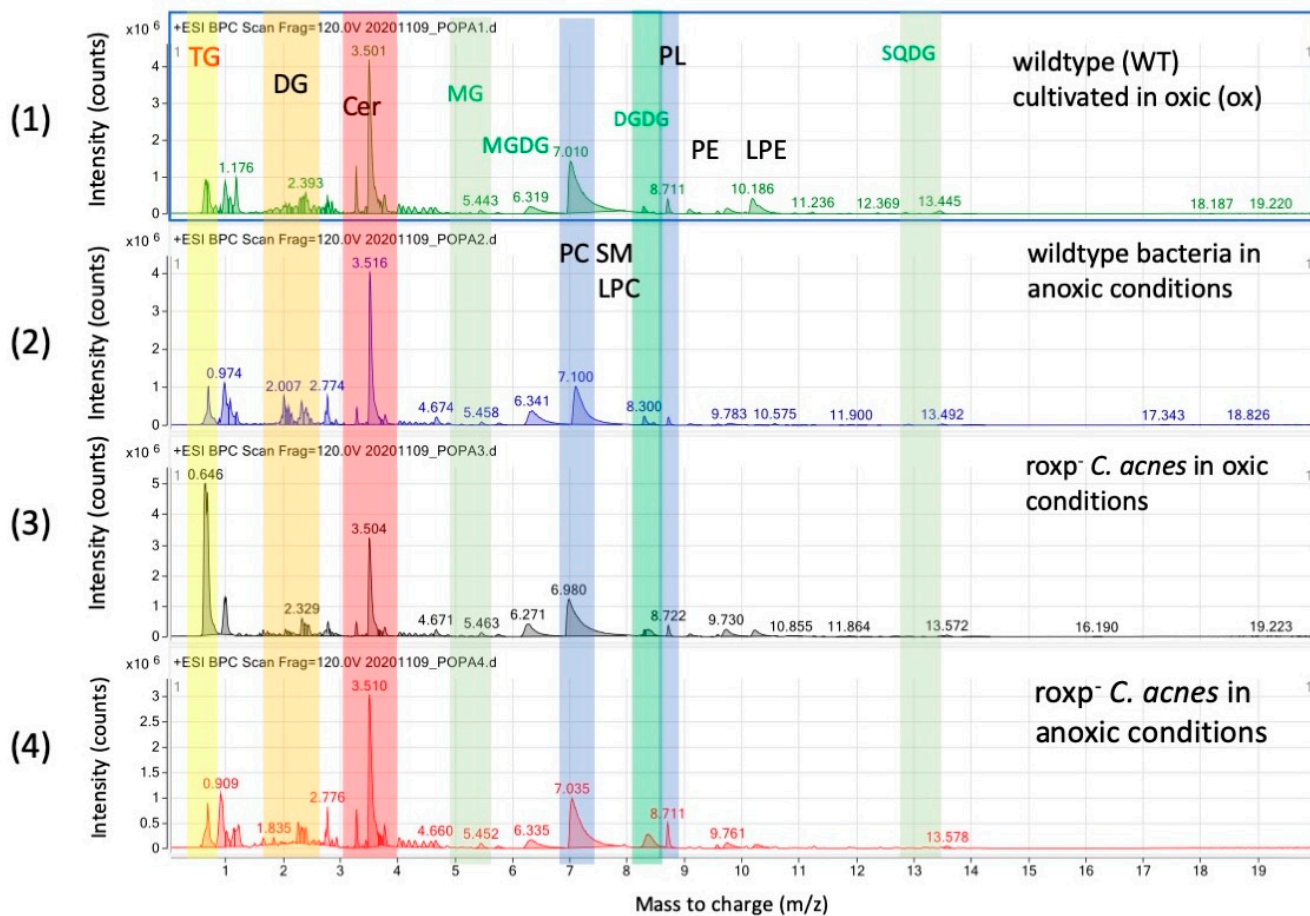

**Figure S1.** Lipids detection in *Cutibacterium acnes* by LC-MS in positive mode in function of the retention time (min). The lipidome of 1) wildtype bacteria in oxic conditions, 2) wildtype bacteria in anoxic conditions, 3) *roxp<sup>-</sup>* *C. acnes* in oxic conditions, and 4) *roxp<sup>-</sup>* *C. acnes* in anoxic conditions.

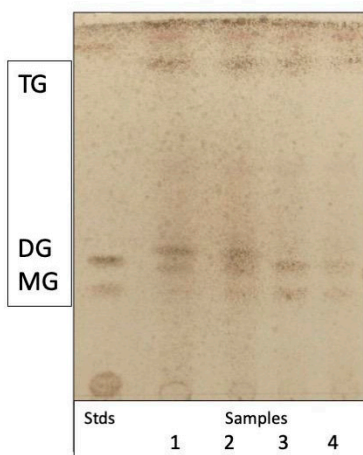

**Figure S2.** HPTLC of the mono-, di- and triglycerides from all samples (1) wildtype bacteria cultured in oxic (2) wildtype bacteria cultured in anoxic conditions, (3) *roxp<sup>-</sup>* isogenic mutant cultured in oxic (4) *roxp<sup>-</sup>* isogenic mutant cultured in anoxic conditions. Spotted amount of the samples is 50% of the whole amount. Spotted standard of Fatty acid is 5  $\mu$ l (2 mg/ml), revelation in Cu acetate [12].

**Table S1. The Free Fatty Acids (FA) Type present in the 4 samples**

(Theo-  $m/z$  theoretical,  $m/z$  identified in negative MS)

| FA    | ( $m/z$ )<br>Theo | ( $m/z$ ) |
|-------|-------------------|-----------|
| C12:0 | 199.1698          | 199.1694  |
| C14:0 | 227.2007          | 227.2010  |
| C15:0 | 241.2164          | 241.2160  |
| C16:0 | 255.2320          | 255.2321  |
| C16:1 | 253.2163          | 253.2167  |
| C17:0 | 269.2477          | 269.2480  |
| C17:1 | 267.2320          | 267.2321  |
| C18:0 | 283.2633          | 283.2632  |
| C18:1 | 281.2477          | 281.2479  |
| C18:2 | 279.2320          | 279.2320  |
| C19:0 | 297.2790          | 297.2788  |
| C20:0 | 311.2946          | 311.2944  |
| C20:1 | 309.2789          | 309.2779  |
| C21:0 | 325.3103          | 325.3087  |
| C22:0 | 339.3259          | 339.3255  |
| C23:0 | 353.3416          | 353.3414  |
| C24:0 | 367.3572          | 367.3572  |
| C25:0 | 381.3729          | 381.3723  |
| C26:0 | 395.3885          | 395.3880  |

**Table S2. The Fatty Acids (FA) Type present in the diglycerides in the 4 samples**

(Theo-  $m/z$  theoretical,  $m/z$  identified in positive mode MS)

| FA    | ( $m/z$ )<br>Theo | ( $m/z$ ) |
|-------|-------------------|-----------|
| C29:0 | 544.4933          | 544.4940  |
| C30:0 | 558.5103          | 558.5090  |
| C31:0 | 572.5258          | 572.5250  |
| C32:0 | 586.5413          | 586.5413  |
| C33:0 | 600.5571          | 600.5560  |
| C34:0 | 614.3573          | 614.5720  |
| C36:0 | 642.6035          | 642.6028  |
| C37:1 | 654.6036          | 654.6028  |
| C37:0 | 656.6183          | 656.6185  |

**Table S3. The Fatty Acids (FA) Type present in the triglycerides in the 4 samples**

(Theo-  $m/z$  theoretical,  $m/z$  identified in positive mode MS)

| FA    | ( $m/z$ )<br>Theo | ( $m/z$ ) |
|-------|-------------------|-----------|
| C19:0 | 418.3169          | 418.3174  |
| C22:0 | 460.3638          | 460.3642  |
| C24:0 | 488.3951          | 488.3958  |
| C25:0 | 502.4108          | 502.4106  |
| C26:0 | 516.4264          | 516.4273  |
| C27:0 | 530.4421          | 530.4432  |
| C28:0 | 544.4577          | 544.4589  |
| C29:1 | 558.4734          | 558.4747  |
| C30:0 | 572.4890          | 572.4896  |
| C31:0 | 586.5047          | 586.5054  |
| C33:0 | 614.5360          | 614.5364  |

**Table S4. SQDG in the 4 samples  $m/z$  found by SFC-HRMS analysis of 13.3 – 13.6 min area**

(Theo-  $m/z$  theoretical,  $m/z$  identified in positive mode MS)

| SQDG  | ( $m/z$ )<br>Theo | ( $m/z$ ) |
|-------|-------------------|-----------|
| C30:0 | 789.48            | 789.48    |
| C31:0 | 791.40            | 791.47    |
| C32:6 | 805.42            | 805.48    |
| C33:6 | 819.43            | 833.51    |
| C34:6 | 833.45            | 833.51    |
| C34:0 | 826.57            | 826.58    |
| C35:6 | 842.51            | 842.57    |
| C36:6 | 856.53            | 856.59    |

**Table S5. SQDG  $m/z$  805.5 and DGDG 910.6 after positive mode MS analysis of 13.3 – 13.6 min area (ref [15])**

| Sulfoglycolipid, $m/z$ | Lipid Species (C:N)<br>Carbons atoms: N double bounds | FA acyl chain |
|------------------------|-------------------------------------------------------|---------------|
| 805.5                  | SQDG(33:1)                                            | 17:1/16:0     |
| 910.6                  | DGDG (32:0)                                           | 16:0/16:0     |
